# Supplementary material for: Synthesis of an ammelide-based ultra-microporous Cd-MOF for sensitive detection of dichromate ions
Source: Royal Society of Chemistry journal article supplement (doi:10.1039/d4cc05516k), 2024-12-26
Supplement: d4cc05516k1.pdf [file d4cc05516k1.pdf]

## Supporting Information

### **Synthesis of an Ammelide-Based Ultra-microporous Cd-MOF for Sensitive Detection of Dichromate Ions**

Linfeng Liang,<sup>1,2\*</sup> Yin-Kang Ding,<sup>1</sup> Yang Yin,<sup>1</sup> Feng-Fan Yang,<sup>1</sup> Jing Yang<sup>1</sup>

<sup>1</sup>Institute of Crystalline Materials, Shanxi University, Taiyuan 030006, Shanxi, China

<sup>2</sup>Key Laboratory of Materials for Energy Conversion and Storage of Shanxi Province

*E-mail: [jtcl@sxu.edu.cn](mailto:jtcl@sxu.edu.cn)*

#### **Contents**

**Section 1. Materials and Synthetic Procedures.....S2**

**Section 2. Methods.....S5**

**Section 3. Supporting Tables.....S8**

**Section 4. Supporting Figures.....S10**

**Section 5 Supporting References.....S13**

## Section 1 Materials and Synthetic Procedures

All solvents and materials except ammelide were purchased commercially and used without further purification. 5-Azacytosine was purchased from Adamas-Beta. DMF and Methanol were purchased from Tianjin Damao Chemical Reagent Factory.

### *Synthesis of Ammelide*

2.00g 5-Azacytosine was put into 40mL of acetic acid, and 20.00mL of 30% hydrogen peroxide was added, and heated to 50°C with stirring, and the reaction was carried out for 6h, and then the reaction was allowed to stand at 5°C for 24 hours, and a white precipitate was obtained. Then the white precipitate was filtered out, washed with water and dried to obtain 1.64 g ammelide, with a yield of 71.62%. <sup>1</sup>H NMR (DMSO-d<sub>6</sub>, 600 MHz, δ) as shown in Figure S1 10.73, 10.43, and 7.00 ppm, with an integrated area ratio of approximately 1:1:2. Characteristic IR stretching vibrations at 3304, 2861, 2810, 1736, 1700, 1460, 1419, 1267, 1180, 1092, 1042, 987, 908, 869, 660, 566, and 540 cm<sup>-1</sup> (Figure S2), which are consistent with previously reported spectrum of ammelide. Infrared absorption spectra show that the stretching vibration at 3500~3300 cm<sup>-1</sup> is attributed to R<sub>2</sub>N-H and at 1640 cm<sup>-1</sup> to R<sub>2</sub>C=O. The standard ammelide has stretching vibration peaks at 1180 and 1092 cm<sup>-1</sup>. This is due to the C-O stretching vibration in the ammelide resonant, while 5-Azacytosine does not have any stretching vibration peaks. This indicates that 5-Azacytosine has been transformed to form ammelide. The UV-Vis absorption peak was observed at 200 nm (Figure S3) for 5-Azacytosine, while the obtained product reveals major absorption peak at 198 nm and 220 nm (Figure S4).

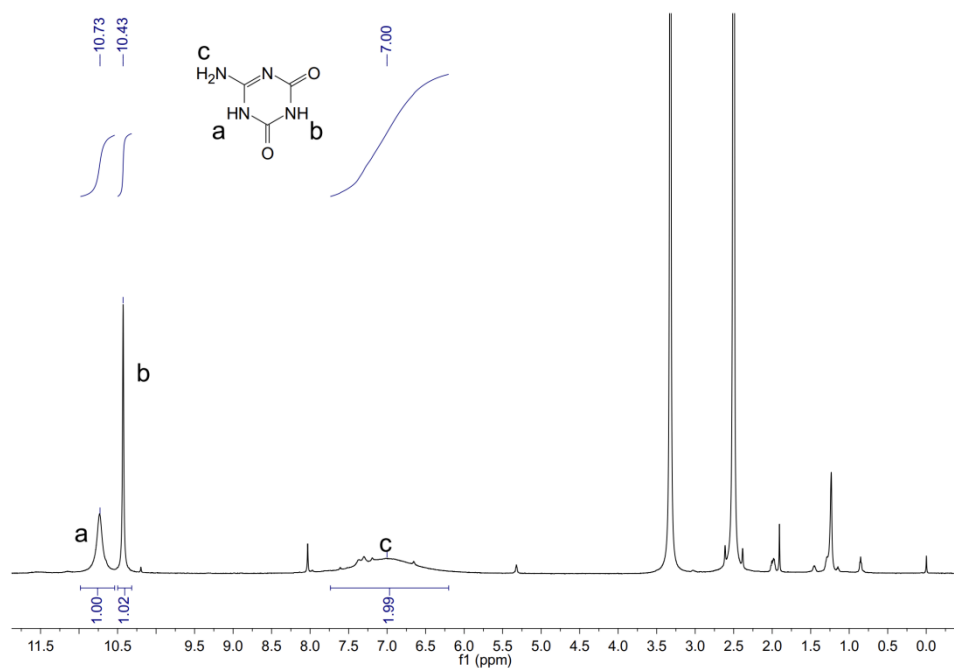

**Figure S1.**  $^1\text{H}$  NMR (600 MHz,  $\text{DMSO-d}_6$ ) spectra of as synthesized ammelide.

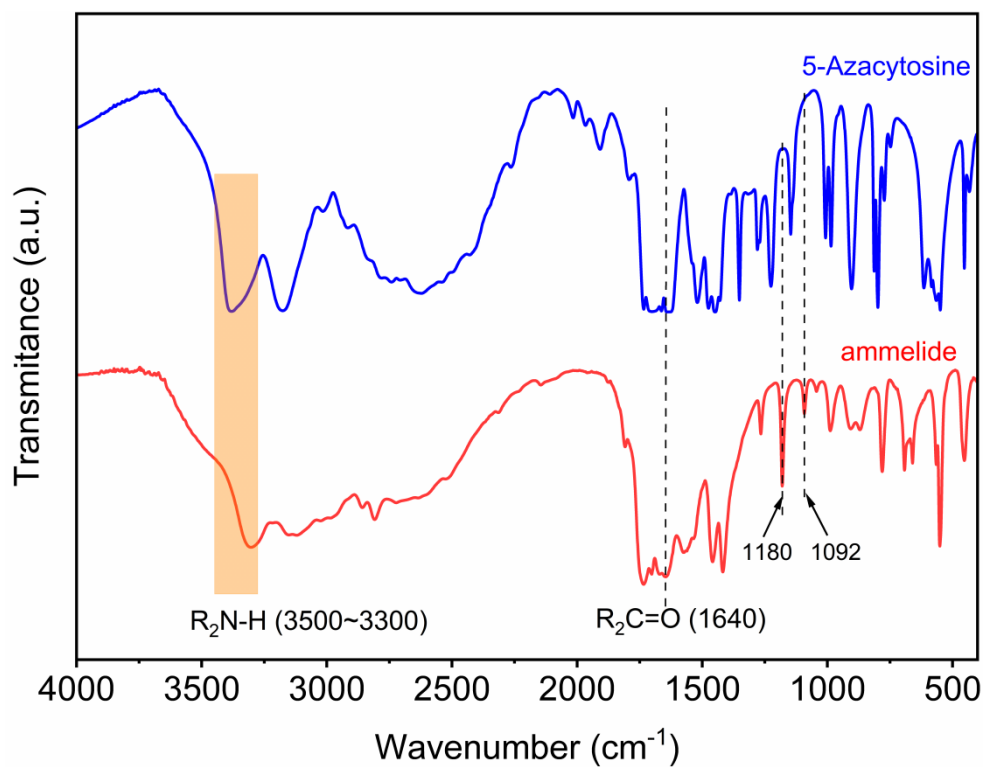

**Figure S2.** Infrared absorption spectra of 5-Azacytosine and ammelide.

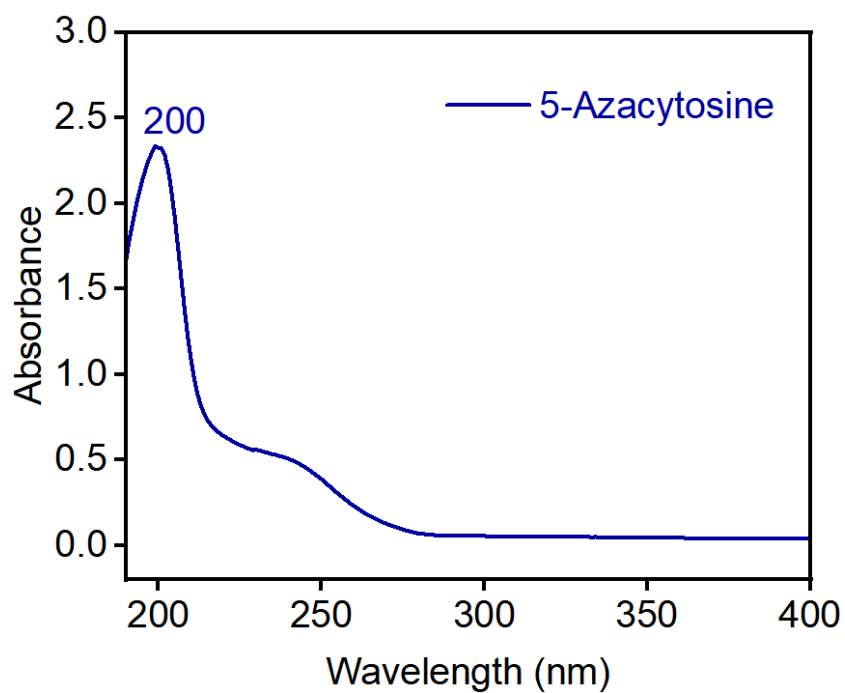

**Figure S3.** UV-Vis absorption spectrum of 5-Azacytosine .

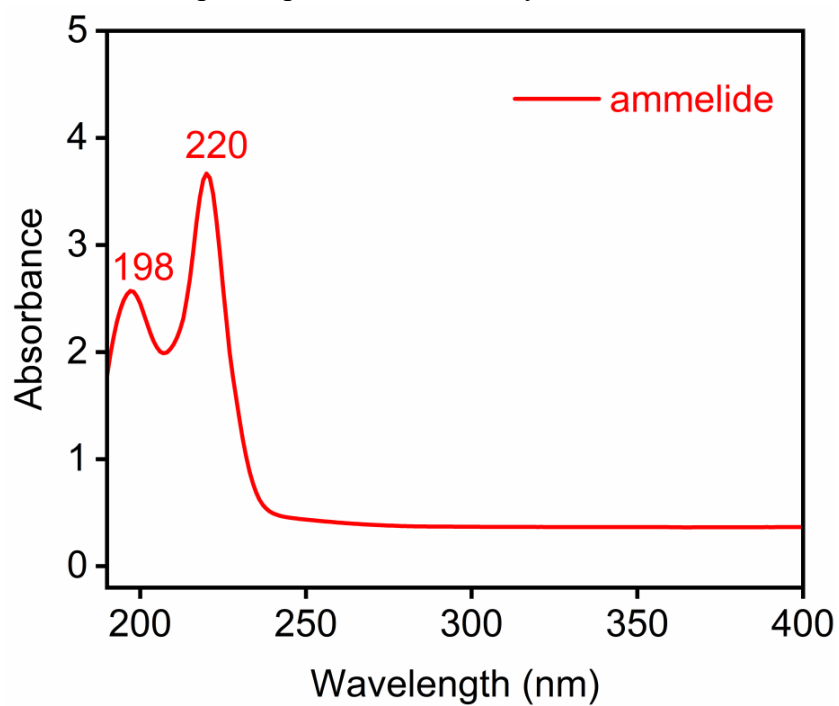

**Figure S4.** UV-Vis absorption spectrum of ammelide.

### ***Synthesis of SXU-122***

A mixture of ammelide (0.1 mmol, 13 mg) and  $\text{Cd}(\text{NO}_3)_2 \cdot 4\text{H}_2\text{O}$  (1 mol/L, 100  $\mu\text{L}$ ) were dissolved in N,N-dimethylformamide/anhydrous methanol (v/v=1:1) (3 mL) and sealed in a glass tube, which was heated at 120°C for 72 hours.

### ***Activated procedure of SXU-122***

After filtration, the crystalline SXU-122 was immersed in DMF solution for 3 days, exchanging fresh ethanol solution every day to remove the residual solvent, and then fresh acetone solvent to remove the DMF solvent in the same way. Finally, SXU-122 was vacuum dried at 100°C for 24 h to obtain colorless rod-like SXU-122 with 63% yield.

## **Section 2 Methods**

### ***Characterization***

1. PXRD. The PXRD patterns of SXU-122 in different solvents (deionized water, ethanol, DMSO, etc.) were obtained by the following method: 10 mg SXU-122 was immersed in different solvents for specified period of time and filter, milled for PXRD testing. Variable temperature PXRD tests were conducted after heating SXU-122 sample to a specified temperature in a muffle furnace at a rate of 10 °C min<sup>-1</sup> first and then stabilizing for 30 min. The Powder X-ray diffraction (PXRD) patterns were collected on a Rigaku Ultima IV X-ray diffractometer with a step width of 1° min<sup>-1</sup> in 2 $\theta$  using Cu K $\alpha$  ( $\lambda = 0.15406$  nm) radiation at 40 kV and 40 mA.

2. Fluorescence experiments. Fluorescence emission and excitation spectra were obtained on a FLS-980 fluorescence spectrometer. We measured solid-state fluorescence emission spectroscopy of activated SXU-122 and ammelide with identical mass under the same conditions. The details of the fluorescence emission

spectra test in the liquid state were as follows, 2 mg of activated SXU-122 was milled, and added to 3 mL of deionized water and sonicated for 45 min. and then transferred to a fluorescence cuvette to test the emission spectra and use it as a blank sample. For anion detection and anti-interference experiments, we added other anions to the blank sample to observe the changes in the fluorescence emission spectra.

3. Gas adsorption measurements. The N<sub>2</sub> gas adsorption isotherms at 77K were obtained on a Quantachrome autosord iQ2 analyzer. We soaked 60 mg of SXU-122 in 10 mL of DMF for three days, exchanging it twice a day with fresh DMF, after which it was immersed in acetone for three days in the same way. Finally, SXU-122 was dried under vacuum at 373 K for 12h. Before measurement, SXU-122 samples were degassed under vacuum at 373 K for 8 h.

4. Infrared absorption spectroscopy of ammelide. We milled 2 mg of ammelide and 200 mg of KBr under the heat of an infrared baking lamp, and a portion of the sample was added to a mold to be pressed, after which it was placed in an infrared absorption spectrometer to obtain the infrared absorption spectrum of ammelide. Infrared absorption spectra were collected on a Fourier Transform Infrared Spectrometer model Nicolette iS5. Before the test, the samples and KBr were dried in an oven at 353 K for 1 h to remove surface water.

5. Thermogravimetry analyses (TG) were performed in the temperature range of 30 – 900 ° C, with a heating rate of 10 ° C min<sup>-1</sup> under flowing nitrogen atmosphere on a Netzsch STA 449C simultaneous thermal analyzer.

### ***X-ray crystallographic structure determination of SXU-122***

The single crystal data were collected with a Rigaku XtaLab P200 diffractometer and a Dectris Pilatus 200K system at 298 K. The system was equipped with a MicroMax007 HF/VariMax rotating anode X-ray generator with confocal monochromatic Mo-K $\alpha$  radiation. The collected data were solved and refined by full matrix least squares using SHELXL 2016/4.[1] The phases of the synthesized crystals were identified using powder X-ray diffraction (PXRD) method. Based on the single crystal diffraction data, simulated PXRD patterns were generated using Mercury 3.9 software.

## Section 3 Supporting Tables

**Table S1** Crystallographic parameters of **SXU-122**.

| Compound                                                                                                                         | <b>SXU-122</b>                                                                                   |
|----------------------------------------------------------------------------------------------------------------------------------|--------------------------------------------------------------------------------------------------|
| CCDC                                                                                                                             | 2382000                                                                                          |
| Empirical formula                                                                                                                | C <sub>6</sub> H <sub>6</sub> CdN <sub>8</sub> O <sub>4</sub> [C <sub>3</sub> H <sub>7</sub> NO] |
| Formula weight                                                                                                                   | 439.69                                                                                           |
| Temperature (K)                                                                                                                  | 298(2)                                                                                           |
| Crystal system                                                                                                                   | trigonal                                                                                         |
| Space group                                                                                                                      | <i>P</i> 3 <sub>1</sub> 21                                                                       |
| a (Å)                                                                                                                            | 12.7618(2)                                                                                       |
| b (Å)                                                                                                                            | 12.7618(2)                                                                                       |
| c (Å)                                                                                                                            | 7.6340(2)                                                                                        |
| α (°)                                                                                                                            | 90                                                                                               |
| β (°)                                                                                                                            | 90                                                                                               |
| γ (°)                                                                                                                            | 120                                                                                              |
| Volume(Å <sup>3</sup> )                                                                                                          | 1076.73(4)                                                                                       |
| Z                                                                                                                                | 3                                                                                                |
| D <sub>c</sub> (g cm <sup>-3</sup> )                                                                                             | 1.696                                                                                            |
| μ (mm <sup>-1</sup> )                                                                                                            | 1.543                                                                                            |
| F (000)                                                                                                                          | 534.0                                                                                            |
| Radiation                                                                                                                        | Mo-Kα (λ = 0.71073 Å)                                                                            |
| Goodness-of-fit on F <sup>2</sup>                                                                                                | 1.140                                                                                            |
| Final R indexes <sup>[a]</sup>                                                                                                   | R <sub>1</sub> = 0.0296, wR <sub>2</sub> = 0.0663                                                |
| Final R indexes [all data] <sup>[a]</sup>                                                                                        | R <sub>1</sub> = 0.0311, wR <sub>2</sub> = 0.0668                                                |
| Largest diff. peak/hole / e Å <sup>-3</sup>                                                                                      | 1.51/-0.91                                                                                       |
| $R_1 = \frac{\sum   F_0  -  F_c  }{\sum  F_0 }; wR_2 = \left[ \frac{\sum w( F_0 ^2 -  F_c ^2)^2}{\sum w(F_0^2)^2} \right]^{1/2}$ |                                                                                                  |



**Table S2.** Comparison with other reported MOF-based fluorescent sensors.

| Material | Analytes       | Method       | Quenching constant, $K_{sv}$ | Ref       |
|----------|----------------|--------------|------------------------------|-----------|
| Eu-MOF   | $Cr_2O_7^{2-}$ | Fluorescence | $1.14 \times 10^4 M^{-1}$    | [2]       |
| Tb-MOF   | $Cr_2O_7^{2-}$ | Fluorescence | $8.23 \times 10^3 M^{-1}$    | [2]       |
| Zr-MOFs  | $Cr_2O_7^{2-}$ | Fluorescence | $8.85 \times 10^3 M^{-1}$    | [3]       |
| Zn-MOFs  | $Cr_2O_7^{2-}$ | Fluorescence | $1.18 \times 10^3 M^{-1}$    | [4]       |
| Cd-MOFs  | $Cr_2O_7^{2-}$ | Fluorescence | $6.73 \times 10^5 M^{-1}$    | [5]       |
| BUT-39   | $Cr_2O_7^{2-}$ | Fluorescence | $1.57 \times 10^4 M^{-1}$    | [6]       |
| Zr-MOFs  | $Cr_2O_7^{2-}$ | Fluorescence | $6.49 \times 10^4 M^{-1}$    | [7]       |
| Zr-MOFs  | $Cr_2O_7^{2-}$ | Fluorescence | $6.88 \times 10^3 M^{-1}$    | [8]       |
| Zn-MOFs  | $Cr_2O_7^{2-}$ | Fluorescence | $7.59 \times 10^3 M^{-1}$    | [9]       |
| Tb-MOFs  | $Cr_2O_7^{2-}$ | Fluorescence | $1.01 \times 10^4 M^{-1}$    | [10]      |
| Eu-MOFs  | $Cr_2O_7^{2-}$ | Fluorescence | $0.72 \times 10^4 M^{-1}$    | [10]      |
| Eu-MOFs  | $Cr_2O_7^{2-}$ | Fluorescence | $8.98 \times 10^3 M^{-1}$    | [11]      |
| IUST-1   | $Cr_2O_7^{2-}$ | Fluorescence | $3.31 \times 10^4 M^{-1}$    | [12]      |
| Pb-MOFs  | $Cr_2O_7^{2-}$ | Fluorescence | $2.56 \times 10^3 M^{-1}$    | [13]      |
| SXU-122  | $Cr_2O_7^{2-}$ | Fluorescence | $2.93 \times 10^4 M^{-1}$    | this work |

## Section 4 Supporting Figures

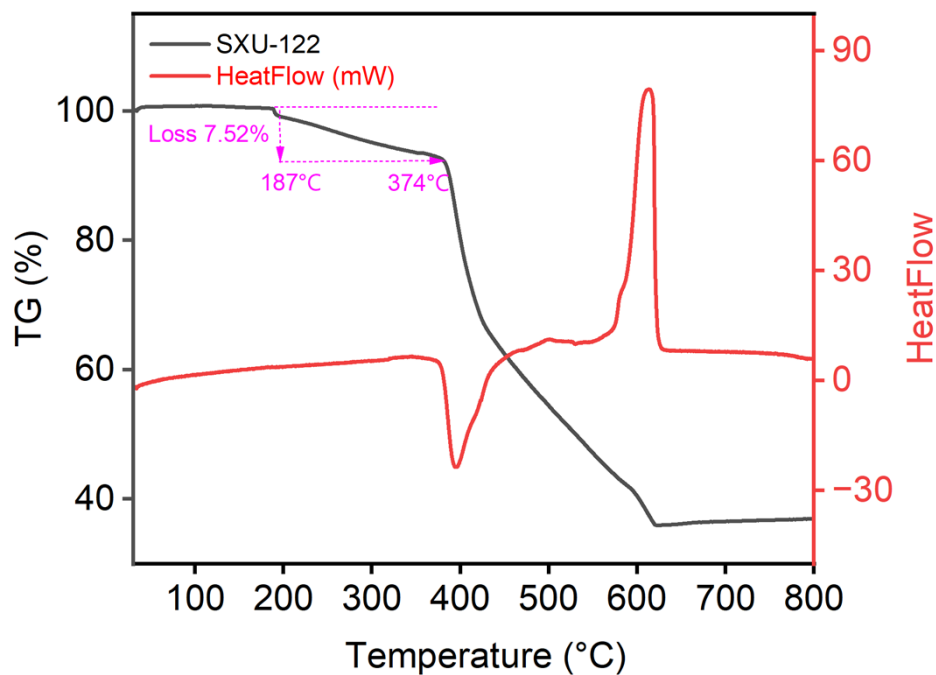

**Figure S5.** The TG and heat flow curves of the unactivated SXU-122

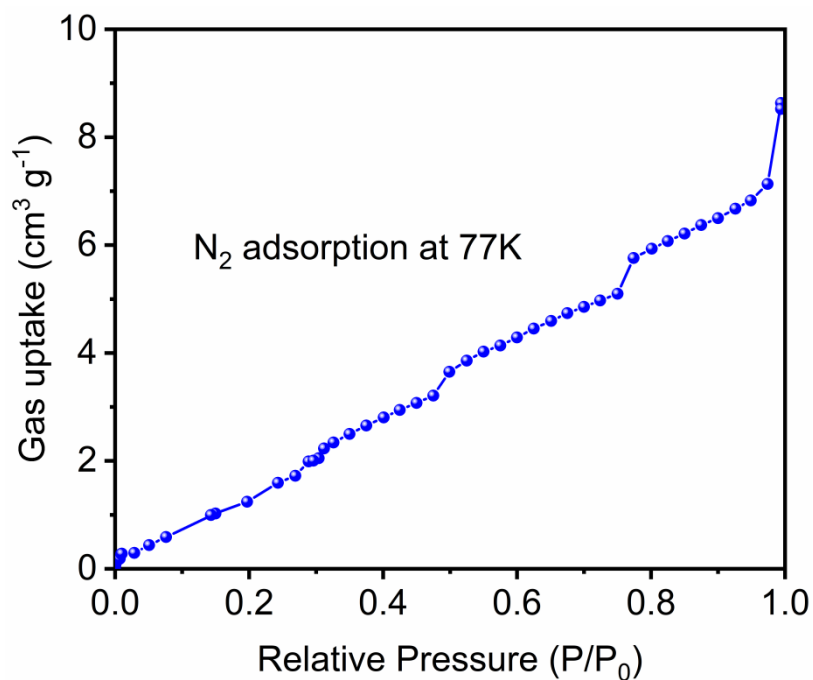

**Figure S6.** N<sub>2</sub> adsorption isotherm at 77K of SXU-122.

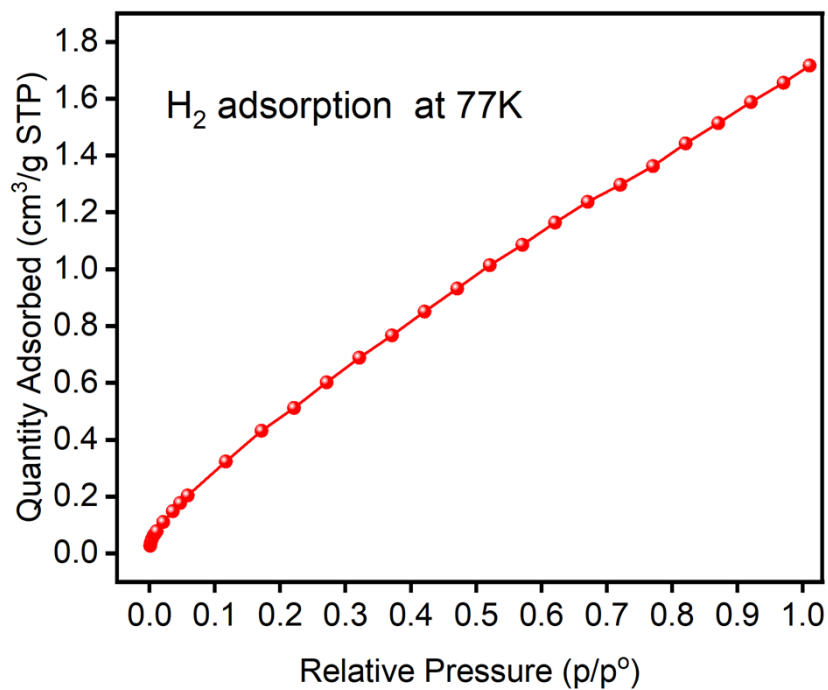

**Figure S7.** H<sub>2</sub> adsorption isotherm at 77K of SXU-122.

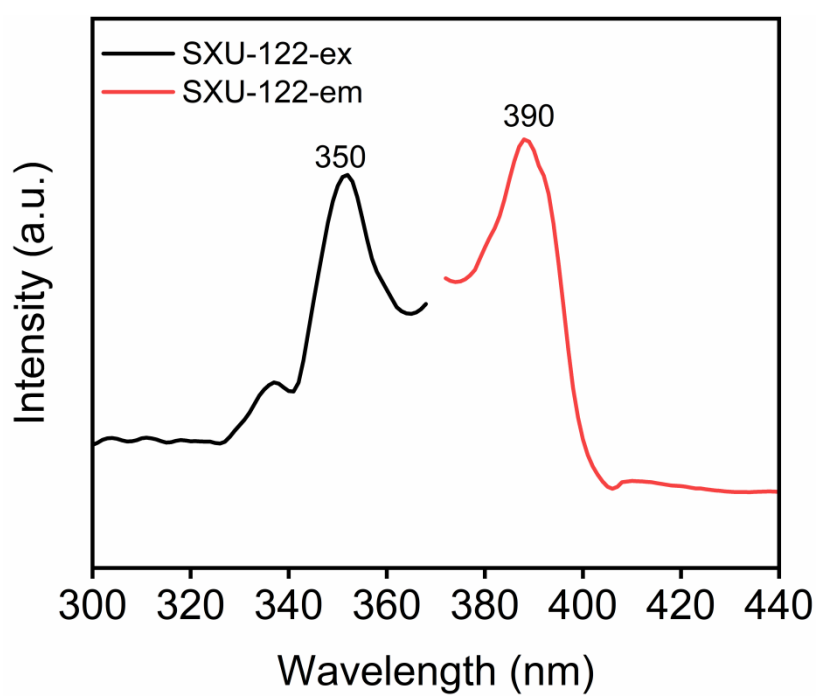

**Figure S8.** Excitation and emission spectra of SXU-122.

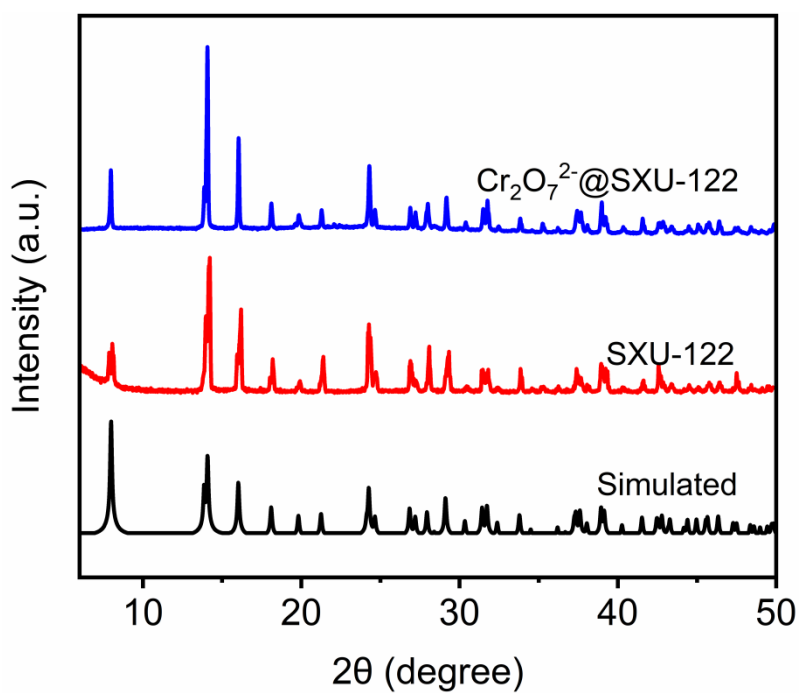

**Figure S9.** PXRD patterns simulated SXU-122, as-synthesized SXU-122 and  $\text{Cr}_2\text{O}_7^{2-}@SXU-122$ .

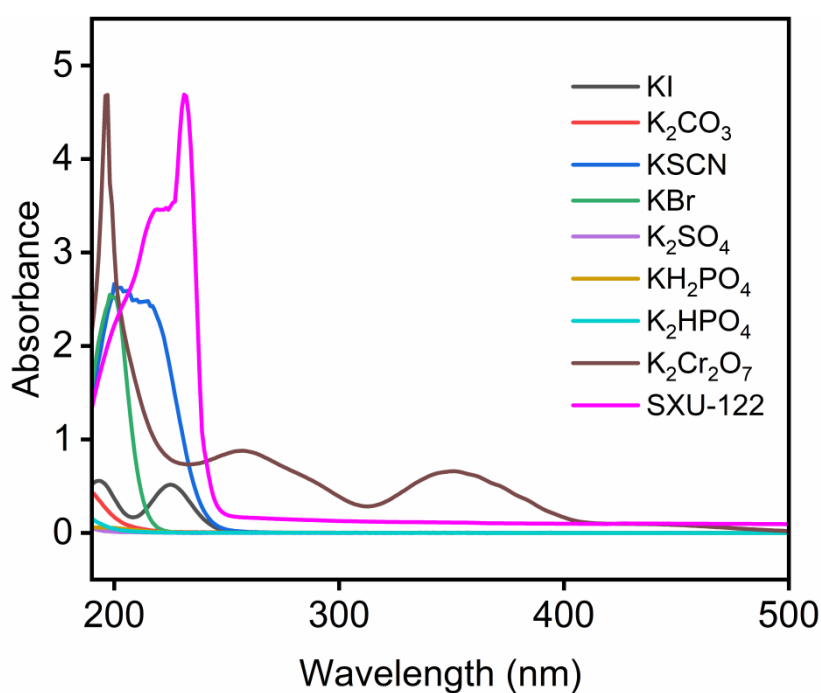

**Figure S10.** UV-Vis absorption spectra of different potassium salts with different anions and SXU-122 in deionized water.

## Section 5 Supporting References

- [1] Sheldrick G M, et al. *Acta Crystallographica Section A Foundations and Advances*, 2015, 71, 3-8
- [2] Yu H, Fan M, Liu Q, et al. *Inorganic Chemistry*, 2020, 59, 2005-2010
- [3] Xin Y, Gu Q, Cheng S, et al. *ACS Applied Optical Materials*, 2024, 2, 697-703
- [4] Sun Q, Yang K, Ma W, et al. *Inorganic Chemistry Frontiers*, 2020, 7, 4387-4395
- [5] Ru J, Zhang R-F, Wang Y-X, et al. *Journal of Solid State Chemistry*, 2022, 311, 123119
- [6] He T, Zhang Y-Z, Kong X-J, et al. *ACS Applied Materials & Interfaces*, 2018, 10, 16650-16659
- [7] Wang X, Zhang Y, Shi Z, Lu T, et al. *ACS Applied Materials & Interfaces*, 2021, 13, 54217-54226
- [8] Hu X, Zhang Y, Liu H, et al. *Journal of Agricultural and Food Chemistry.*, 2023, 71, 20575-20584
- [9] Lv R, Wang J, Zhang Y, et al. et al. *Journal of Materials Chemistry A*, 2016, 4, 15494-15500
- [10] Zhou Z-D, Wang C-Y, Zhu G-S, et al. *Journal of Materials Chemistry*, 2022, 1251, 15494
- [11] Zhang C, Sun L, Yan Y, Shi H, et al. *Journal of Materials Chemistry C*, 2017, 5, 8999-9004
- [12] Karbalaee Hosseini A, Pourshirzad Y, Tadjarodi A, et al. *Journal of Solid State Chemistry*, 2023, 317, 123676
- [13] Ran Z, Cao S, Peng Q, Liu X, et al. *Inorganic Chemistry*, 2022, 61, 5957-5964
